## Real-time PCR for detection of plasmid-mediated polymyxin resistance (*mcr-1*) from cultured bacteria and stools

S  verine Bontron<sup>1</sup>, Laurent Poirel<sup>1\*</sup> and Patrice Nordmann<sup>1,2</sup>

<sup>1</sup>Emerging Antibiotic Resistance Unit, Medical and Molecular Microbiology, Department of Medicine, Faculty of Science, University of Fribourg, Fribourg, Switzerland; <sup>2</sup>H  pital Cantonal HFR, Fribourg, Switzerland

\*Corresponding author. Tel: +41-26-300-9582; E-mail: laurent.poirel@unifr.ch

Received 19 January 2016; returned 8 March 2016; revised 16 March 2016; accepted 24 March 2016

**Objectives:** The aim of the study was to develop a simple assay for rapid detection of the *mcr-1* gene, recently identified as a source of plasmid-mediated acquired resistance to polymyxins in Enterobacteriaceae.

**Methods:** A SYBR Green-based real-time PCR assay was designed for detection of the *mcr-1* gene. This assay was applied to cultured bacteria and to spiked human and cattle stools.

**Results:** The *mcr-1* gene could be detected with a lower limit of 10<sup>2</sup> cultured bacteria. This test was highly sensitive and specific, and generated no false-positive results. The assay was also conclusive when applied to stools spiked with *mcr-1*-positive *Escherichia coli*.

**Conclusions:** This simple, rapid, sensitive and specific assay will be useful for rapid screening of this resistance trait in both human medicine and veterinary medicine.

### Introduction

Colistin is a polymyxin antibiotic widely used in animal production and currently increasingly prescribed for therapeutic usage in human medicine, as a consequence of the spread of MDR Gram-negatives. So far, acquired resistance to colistin has involved chromosomal mutations in genes encoding proteins involved in the lipopolysaccharide biosynthesis pathway.<sup>1</sup> Recently, the first plasmid-mediated colistin resistance determinant, MCR-1, has been identified in Enterobacteriaceae.<sup>2</sup> The *mcr-1* gene, encoding a phosphoethanolamine transferase, was first identified among Chinese enterobacterial isolates of human and animal origin, and then worldwide, mainly in *Escherichia coli*.<sup>2–9</sup> Here, a SYBR Green-based real-time PCR assay is proposed, for rapid, sensitive and specific detection of the *mcr-1* gene from cultured bacteria and stools.

### Materials and methods

#### Quantitative PCR

The SYBR Green quantitative PCR (qPCR) assay for detection of *mcr-1* was performed with primers *mcr-1*-qF1 (5'-ACACTTATGGCAGGCTCATG-3') and *mcr-1*-qR1 (5'-GCACACCAACCAATGATAC-3') internal to the *mcr-1* gene (designed using the PrimerQuest program, Integrated DNA Technologies) and with universal primers 27F (5'-AGAGTTTGTATCCTGGCTCAG-3') and 338R (5'-GCTGCCTCCCGTAGGAGT-3') for the 16S rRNA gene used as a control. The product sizes of the amplicons were 120 and 350 bp, and the melting temperatures were 82.5 and 86.7  C, respectively. Similar results were obtained

for *mcr-1* with primers *mcr-1*-qF2 (5'-TGGCGTTCAGCAGTCATTAT-3') and *mcr-1*-qR2 (5'-AGCTTACCCACCGAGTAGAT-3'). This pair of primers may detect *mcr-1* variants to which the *mcr-1*-qF1 and *mcr-1*-qR1 primers would not anneal. Standard control for the *mcr-1* qPCR was a purified 1646 bp PCR product of the *mcr-1* gene (1.8 pg of DNA corresponding to 10<sup>6</sup> copies) generated with primers *mcr-1*-F (5'-ATGATGCAGCATACTTCTGTGTG-3') and *mcr-1*-R (5'-TCAGCGGATGAATGCGGTGC-3'). Standard control for the 16S rRNA gene qPCR was *E. coli* TOP10 (Life Technologies, Carlsbad, CA, USA) total genomic DNA, with 5 ng corresponding to 7   10<sup>6</sup> 16S rRNA copies or 10<sup>6</sup> cells, the RNA operon being present at 7 copies per genome in *E. coli*.<sup>10</sup> A total of 15  L qPCRs were processed in a Rotor-Gene Q (Qiagen, Hilden, Germany) with a KAPA SYBR FAST qPCR Kit (Kapabiosystems, Wilmington, MA, USA), according to the manufacturer's instructions. Cycling conditions were 95  C for 2 min and 40 cycles of 95  C for 3 s, 60  C for 20 s and 72  C for 7 s, followed by a ramp from 72  C to 95  C for melting analysis. The copy numbers of the 16S rRNA and *mcr-1* genes were calculated according to the values obtained with the standard curves. For DNA extracted from spiked stools, qPCRs were performed with 1  L of template with the same cycling protocol, except for spiked human stools, for which the annealing temperature was revised to 63  C.

#### Boiled-lysate DNA extraction

Both *mcr-1*-positive and *mcr-1*-negative strains of human and animal origins were collected in France, Switzerland and South Africa (see Table 2). DNA was extracted from cultured bacteria with the boiled-lysate protocol, with one 1  L loop of bacteria (corresponding to 1   10<sup>8</sup> to 2   10<sup>8</sup> bacteria or 0.2–0.4 OD<sub>600</sub>) being resuspended in 20  L of 10 mM Tris-EDTA pH8 buffer, and incubated for 10 min at 95  C. After centrifugation for 2 min at 20 000 g, 20  L of supernatant was added to 80  L of H<sub>2</sub>O.

**Table 1.** Quantitative detection of the *mcr-1* gene in *E. coli*

| Isolate | <i>mcr-1</i> <sup>a</sup> | Template dilution <sup>b</sup> | qPCR: <i>mcr-1</i> copies <sup>c</sup> | qPCR: 16S rRNA copies <sup>c</sup> | <i>mcr-1</i> copy number <sup>d</sup> |
|---------|---------------------------|--------------------------------|----------------------------------------|------------------------------------|---------------------------------------|
| Ec1     | +                         | 1                              | 3 600 000                              | 8 400 000                          | 3.0                                   |
| Ec1     | +                         | 10 <sup>-2</sup>               | 40 000                                 | 98 000                             | 2.9                                   |
| Ec1     | +                         | 10 <sup>-4</sup>               | 350                                    | 980                                | 2.5                                   |
| KRI     | +                         | 1                              | 2 200 000                              | 9 800 000                          | 1.6                                   |
| KRI     | +                         | 10 <sup>-2</sup>               | 26 000                                 | 126 000                            | 1.4                                   |
| KRI     | +                         | 10 <sup>-4</sup>               | 270                                    | 980                                | 1.9                                   |
| Ec8     | -                         | 1                              | 0                                      | 5 200 000                          | 0                                     |
| Ec8     | -                         | 10 <sup>-4</sup>               | 0                                      | 630                                | 0                                     |
| TOP10   | -                         | 1                              | 0                                      | 7 700 000                          | 0                                     |
| TOP10   | -                         | 10 <sup>-4</sup>               | 0                                      | 1000                               | 0                                     |

<sup>a</sup>Isolates were previously characterized for the presence of the *mcr-1* gene by conventional PCR and sequencing.

<sup>b</sup>Genomic DNA was extracted from 1×10<sup>8</sup> to 2×10<sup>8</sup> bacteria, resuspended in 100 µL. qPCRs were performed with 1 µL of genomic DNA or with the indicated dilution.

<sup>c</sup>*mcr-1* or 16S rRNA copies detected in the qPCR.

<sup>d</sup>Estimate of the *mcr-1* copy number per bacterium, obtained by dividing number of *mcr-1* copies by the number of 16S rRNA copies multiplied by 7 (the RNA operon being present at 7 copies per genome in *E. coli*).

**Table 2.** Specificity of the qPCR assay for detection of the *mcr-1* gene

| Isolate              | Species              | <i>mcr-1</i> <sup>a</sup> | Associated β-lactamase  | qPCR: <i>mcr-1</i> copies <sup>b</sup> | <i>mcr-1</i> copy number <sup>c</sup> | Origin       | Reference         |
|----------------------|----------------------|---------------------------|-------------------------|----------------------------------------|---------------------------------------|--------------|-------------------|
| KRI                  | <i>E. coli</i>       | +                         | bla <sub>VIM-1</sub>    | 2 000 000                              | 1.6                                   | Switzerland  | 7                 |
| Ec1                  | <i>E. coli</i>       | +                         | bla <sub>CMY-2</sub>    | 3 200 000                              | 2.5                                   | South Africa | unpublished data  |
| Ec2                  | <i>E. coli</i>       | +                         | none                    | 600 000                                | 1.3                                   | South Africa | unpublished data  |
| Ec3                  | <i>E. coli</i>       | +                         | none                    | 890 000                                | 1.9                                   | South Africa | unpublished data  |
| Ec4                  | <i>E. coli</i>       | +                         | none                    | 1 100 000                              | 1.8                                   | South Africa | unpublished data  |
| Ec5                  | <i>E. coli</i>       | +                         | bla <sub>CTX-M-55</sub> | 610 000                                | 2.4                                   | South Africa | unpublished data  |
| Ec6                  | <i>E. coli</i>       | +                         | none                    | 1 300 000                              | 2.2                                   | South Africa | unpublished data  |
| Ec7                  | <i>E. coli</i>       | +                         | bla <sub>CTX-M-55</sub> | 940 000                                | 3.3                                   | South Africa | unpublished data  |
| Ec8 <sup>d</sup>     | <i>E. coli</i>       | -                         | bla <sub>CTX-M-15</sub> | 0                                      | 0                                     | South Africa | unpublished data  |
| Ec9                  | <i>E. coli</i>       | -                         | bla <sub>OXA-48</sub>   | 0                                      | 0                                     | France       | unpublished data  |
| Ec10                 | <i>E. coli</i>       | -                         | bla <sub>OXA-48</sub>   | 0                                      | 0                                     | France       | unpublished data  |
| Ec11                 | <i>E. coli</i>       | -                         | bla <sub>NDM-1</sub>    | 0                                      | 0                                     | France       | unpublished data  |
| Ec12                 | <i>E. coli</i>       | -                         | bla <sub>VIM-1</sub>    | 0                                      | 0                                     | France       | unpublished data  |
| TOP10                | <i>E. coli</i>       | -                         | none                    | 0                                      | 0                                     | reference    | Life Technologies |
| Cf1                  | <i>C. freundii</i>   | -                         | bla <sub>OXA-48</sub>   | 0                                      | 0                                     | France       | unpublished data  |
| Kp1                  | <i>K. pneumoniae</i> | -                         | bla <sub>OXA-48</sub>   | 0                                      | 0                                     | France       | unpublished data  |
| NK34373 <sup>e</sup> | <i>K. pneumoniae</i> | -                         | none                    | 0                                      | 0                                     | France       | 11                |
| Ec1                  | <i>E. cloacae</i>    | -                         | bla <sub>OXA-48</sub>   | 0                                      | 0                                     | France       | unpublished data  |
| Ec2                  | <i>E. cloacae</i>    | -                         | bla <sub>NDM-1</sub>    | 0                                      | 0                                     | France       | unpublished data  |
| Ko1                  | <i>K. oxytoca</i>    | -                         | bla <sub>VIM-1</sub>    | 0                                      | 0                                     | France       | unpublished data  |

<sup>a</sup>Isolates were previously characterized for the presence of the *mcr-1* gene by conventional PCR and sequencing.

<sup>b</sup>*mcr-1* copies detected in the qPCR performed with 1 µL of genomic DNA.

<sup>c</sup>Estimate of the *mcr-1* copy number per bacterium, obtained by dividing number of *mcr-1* copies by the number of 16S rRNA copies (not shown here) multiplied by 7 (the RNA operon being present at 7 copies per genome in *E. coli*).

<sup>d</sup>Isolate resistant to colistin, unknown mechanism.

<sup>e</sup>Isolate resistant to colistin, disruption of the *mgrB* gene.<sup>11</sup>

### Spiked stools and DNA extraction

An amount of 10<sup>8</sup> bacteria (corresponding to 0.2 OD<sub>600</sub>) or dilution was resuspended in 50 µL of 0.85% NaCl and spiked in 200 µL of human or cattle faecal suspension (75 mg of fresh faeces per 200 µL). DNA was

extracted from spiked stool samples with a DNA extraction ZR Fecal DNA MiniPrep (Zymo Research, Freiburg im Breisgau, Germany) according to the manufacturer's instructions. The samples were lysed with a mixer mill (MM 400, Retsch, Haan, Germany) for 3 min at a frequency of 30 Hz. DNA was

**Table 3.** Detection of the *mcr-1* gene in spiked human and cattle stools

| Isolate | <i>mcr-1</i> <sup>a</sup> | Bacteria/75 mg of faeces | Faeces | qPCR: <i>mcr-1</i> copies <sup>b</sup> |
|---------|---------------------------|--------------------------|--------|----------------------------------------|
| Ec1     | +                         | 10 <sup>8</sup>          | cattle | 970000                                 |
| Ec1     | +                         | 10 <sup>7</sup>          | cattle | 84000                                  |
| Ec1     | +                         | 10 <sup>6</sup>          | cattle | 12000                                  |
| Ec1     | +                         | 10 <sup>5</sup>          | cattle | 1700                                   |
| Ec1     | +                         | 10 <sup>4</sup>          | cattle | 170                                    |
| Ec1     | +                         | 10 <sup>3</sup>          | cattle | 30                                     |
| KRI     | +                         | 10 <sup>7</sup>          | cattle | 19000                                  |
| Ec8     | -                         | 10 <sup>7</sup>          | cattle | 0                                      |
| TOP10   | -                         | 10 <sup>7</sup>          | cattle | 0                                      |
| Ec1     | +                         | 10 <sup>8</sup>          | human  | 950000                                 |
| Ec1     | +                         | 10 <sup>7</sup>          | human  | 120000                                 |
| Ec1     | +                         | 10 <sup>6</sup>          | human  | 5700                                   |
| Ec1     | +                         | 10 <sup>5</sup>          | human  | 990                                    |
| Ec1     | +                         | 10 <sup>4</sup>          | human  | 80                                     |
| Ec1     | +                         | 10 <sup>3</sup>          | human  | 10                                     |
| KRI     | +                         | 10 <sup>7</sup>          | human  | 8100                                   |
| Ec8     | -                         | 10 <sup>7</sup>          | human  | 0                                      |
| TOP10   | -                         | 10 <sup>7</sup>          | human  | 0                                      |

<sup>a</sup>Isolates were previously characterized for the presence of the *mcr-1* gene by conventional PCR and sequencing.

<sup>b</sup>*mcr-1* copies detected in the qPCR; total DNA was extracted from 75 mg of faeces spiked with the indicated cfu of bacteria and qPCRs were performed with 1/80th of the extracted DNA.

recovered in 80 µL of elution buffer and qPCRs were performed with 1 µL of DNA template.

## Results and discussion

The SYBR Green-based real-time PCR assay could reproducibly and quantitatively detect 10<sup>6</sup> to 10<sup>2</sup> copies of *mcr-1* and 7 × 10<sup>6</sup> to 7 × 10<sup>2</sup> copies of 16S rRNA, corresponding to 10<sup>6</sup>–10<sup>2</sup> *E. coli* bacteria. The *r*<sup>2</sup> value was >0.999, the amplification efficiency was ≥0.9 and the slope was between -3.59 and -3.40. This assay could also detect the *mcr-1* and 16S rRNA genes at higher concentrations, but not in the linear range of the qPCR. This assay was applied to two *mcr-1*-positive *E. coli* isolates of human origin, Ec1 and KRI, with Ec8 and TOP10 as negative controls. For Ec1 and KRI, the *mcr-1* gene was detected using 1 µL of DNA template, corresponding to a starting amount of 1 × 10<sup>6</sup> to 2 × 10<sup>6</sup> bacteria, and with 10<sup>-2</sup> and 10<sup>-4</sup> dilutions of the DNA template. Normalization for amplification of the 16S rRNA gene showed that the *mcr-1* gene was present in isolates Ec1 and KRI at ~3 and 1.5 copies per bacterium, respectively (Table 1).

In order to further validate the sensitivity and specificity of this test, it was applied to a larger set of isolates, i.e. eight *mcr-1*-positive and six *mcr-1*-negative *E. coli*, and six *mcr-1*-negative isolates of other species (*Klebsiella pneumoniae*, *Enterobacter cloacae*, *Citrobacter freundii* and *Klebsiella oxytoca*). The assay was sensitive, as it allowed detection of the *mcr-1* gene in all cases. It was also specific, as it did not generate any false-positive signal, in contrast to the previously published conventional PCR assay with the CLR5-F and CLR5-R primers,<sup>2</sup> which generated false-positive signals for two

strains. Normalization for the amplification of the 16S rRNA gene indicated that the *mcr-1* gene was present at 1.3–3.3 copies per bacterial cell (Table 2).

Then, the real-time qPCR assay was applied to cattle and human stools spiked with different concentrations of *mcr-1*-positive bacteria, the rationale for detecting *mcr-1* in stools being that this gene has been frequently identified in animal stools.<sup>2</sup> The *mcr-1* gene was efficiently detected in human and cattle faeces (Table 3).

Overall, this SYBR Green-based real-time PCR assay is a rapid, sensitive and highly specific detection assay for the *mcr-1* gene either from cultured bacteria or from cattle or human stools. It is easy to perform in any laboratory having at its disposal a qPCR machine. This rapid technique may be used for the evaluation of the prevalence of this resistance trait in humans and animals (surveillance studies). In addition, it will be a valuable tool for following up outbreaks in order to promptly isolate colonized patients and assign them to a cohort.

## Funding

This work was supported by the University of Fribourg and by a grant of the ANIWAH ERA-NET project (No. 1.15.08) (Switzerland).

## Transparency declarations

None to declare.

## References

- 1 Falagas ME, Rafailidis PI, Matthaiou DK. Resistance to polymyxins: mechanisms, frequency and treatment options. *Drug Resist Updat* 2010; **13**: 132–8.
- 2 Liu YY, Wang Y, Walsh TR et al. Emergence of plasmid-mediated colistin resistance mechanism MCR-1 in animals and human beings in China: a microbiological and molecular biological study. *Lancet Infect Dis* 2016; **16**: 161–8.
- 3 Nordmann P, Lienhard R, Kieffer N et al. Plasmid-mediated colistin-resistant *Escherichia coli* in bacteremia in Switzerland. *Clin Infect Dis* 2016; doi:10.1093/cid/ciw124.
- 4 Hasman H, Hammerum AM, Hansen F et al. Detection of *mcr-1* encoding plasmid-mediated colistin-resistant *Escherichia coli* isolates from human bloodstream infection and imported chicken meat, Denmark 2015. *Euro Surveill* 2015; **20**: pii=30085.
- 5 Hu Y, Liu F, Lin IY et al. Dissemination of the *mcr-1* colistin resistance gene. *Lancet Infect Dis* 2016; **16**: 146–7.
- 6 Olaitan AO, Chabou S, Okdah L et al. Dissemination of the *mcr-1* colistin resistance gene. *Lancet Infect Dis* 2016; **16**: 147.
- 7 Poirel L, Kieffer N, Liassine N et al. Plasmid-mediated carbapenem and colistin resistance in a clinical isolate of *Escherichia coli*. *Lancet Infect Dis* 2016; **16**: 281.
- 8 Zurfluh K, Poirel L, Nordmann P et al. Occurrence of the plasmid-borne *mcr-1* colistin resistance gene in ESBL-producing Enterobacteriaceae in river water and imported vegetable samples in Switzerland. *Antimicrob Agents Chemother* 2016; **60**: 2594–5.
- 9 Webb HE, Granier SA, Marault M et al. Dissemination of the *mcr-1* colistin resistance gene. *Lancet Infect Dis* 2016; **16**: 144–5.
- 10 Stoddard SF, Smith BJ, Hein R et al. *rrnDB*: improved tools for interpreting rRNA gene abundance in bacteria and archaea and a new foundation for future development. *Nucleic Acids Res* 2015; **43**: D593–8.
- 11 Kieffer N, Poirel L, Nordmann P et al. Emergence of colistin resistance in *Klebsiella pneumoniae* from veterinary medicine. *J Antimicrob Chemother* 2015; **70**: 1265–7.
